# Supplementary material for: Family Health Climate and Adolescents’ Physical Activity and Healthy Eating: A Cross-Sectional Study with Mother-Father-Adolescent Triads
Source: PLOS journal article supplement (doi:10.1371/journal.pone.0143599), 2015-11-25
Supplement: S1 (10.1371/journal.pone.0143599.s001) [file journal.pone.0143599.s001]

STROBE Statement—checklist of items that should be included in reports of observational studies

|                          | Item No | Recommendation                                                                                                                                                                       |                                                            |
|--------------------------|---------|--------------------------------------------------------------------------------------------------------------------------------------------------------------------------------------|------------------------------------------------------------|
| Title and abstract       | 1       | (a) Indicate the study’s design with a commonly used term in the title or the abstract                                                                                               | The title has been modified according to this point        |
|                          |         | (b) Provide in the abstract an informative and balanced summary of what was done and what was found                                                                                  | fulfilled                                                  |
| Introduction             |         |                                                                                                                                                                                      |                                                            |
| Background/rationale     | 2       | Explain the scientific background and rationale for the investigation being reported                                                                                                 | fulfilled                                                  |
| Objectives               | 3       | State specific objectives, including any prespecified hypotheses                                                                                                                     | Fulfilled (page 7)                                         |
| Methods                  |         |                                                                                                                                                                                      |                                                            |
| Study design             | 4       | Present key elements of study design early in the paper                                                                                                                              | fulfilled (Abstract; lines 130-132)                        |
| Setting                  | 5       | Describe the setting, locations, and relevant dates, including periods of recruitment, exposure, follow-up, and data collection                                                      | fulfilled (page 7/8, lines 142-152)                        |
| Participants             | 6       | (a) Cohort study—Give the eligibility criteria, and the sources and methods of selection of participants. Describe methods of follow-up                                              | fulfilled (page 7/8, lines 142-152; page 9, lines 178-183) |
|                          |         | Case-control study—Give the eligibility criteria, and the sources and methods of case ascertainment and control selection. Give the rationale for the choice of cases and controls   |                                                            |
|                          |         | Cross-sectional study—Give the eligibility criteria, and the sources and methods of selection of participants                                                                        |                                                            |
|                          |         | (b) Cohort study—For matched studies, give matching criteria and number of exposed and unexposed                                                                                     |                                                            |
|                          |         | Case-control study—For matched studies, give matching criteria and the number of controls per case                                                                                   |                                                            |
| Variables                | 7       | Clearly define all outcomes, exposures, predictors, potential confounders, and effect modifiers. Give diagnostic criteria, if applicable                                             | fulfilled (page 7, lines 133-138; Measures section)        |
| Data sources/measurement | 8*      | For each variable of interest, give sources of data and details of methods of assessment (measurement). Describe comparability of assessment methods if there is more than one group | fulfilled (Measures section)                               |
| Bias                     | 9       | Describe any efforts to address potential sources of bias                                                                                                                            | N/A                                                        |
| Study size               | 10      | Explain how the study size was arrived at                                                                                                                                            | fulfilled (Procedure and Participants sections)            |
| Quantitative variables   | 11      | Explain how quantitative variables were handled in the analyses. If applicable, describe which groupings were chosen and why                                                         | fulfilled (Measures section)                               |

|                     |     |                                                                                                                                                                                                              |                                                                                                                                                                                           |
|---------------------|-----|--------------------------------------------------------------------------------------------------------------------------------------------------------------------------------------------------------------|-------------------------------------------------------------------------------------------------------------------------------------------------------------------------------------------|
| Statistical methods | 12  | (a) Describe all statistical methods, including those used to control for confounding                                                                                                                        | fulfilled (Data analysis section)                                                                                                                                                         |
|                     |     | (b) Describe any methods used to examine subgroups and interactions                                                                                                                                          | N/A                                                                                                                                                                                       |
|                     |     | (c) Explain how missing data were addressed                                                                                                                                                                  | fulfilled (Data analysis section)                                                                                                                                                         |
|                     |     | (d) <i>Cohort study</i> —If applicable, explain how loss to follow-up was addressed                                                                                                                          | N/A                                                                                                                                                                                       |
|                     |     | <i>Case-control study</i> —If applicable, explain how matching of cases and controls was addressed                                                                                                           |                                                                                                                                                                                           |
|                     |     | <i>Cross-sectional study</i> —If applicable, describe analytical methods taking account of sampling strategy                                                                                                 |                                                                                                                                                                                           |
|                     |     | (e) Describe any sensitivity analyses                                                                                                                                                                        | N/A                                                                                                                                                                                       |
| <b>Results</b>      |     |                                                                                                                                                                                                              |                                                                                                                                                                                           |
| Participants        | 13* | (a) Report numbers of individuals at each stage of study—eg numbers potentially eligible, examined for eligibility, confirmed eligible, included in the study, completing follow-up, and analysed            | Page 14, lines 294-296                                                                                                                                                                    |
|                     |     | (b) Give reasons for non-participation at each stage                                                                                                                                                         | N/A                                                                                                                                                                                       |
|                     |     | (c) Consider use of a flow diagram                                                                                                                                                                           | N/A                                                                                                                                                                                       |
| Descriptive data    | 14* | (a) Give characteristics of study participants (eg demographic, clinical, social) and information on exposures and potential confounders                                                                     | fulfilled (descriptive statistics section).                                                                                                                                               |
|                     |     | (b) Indicate number of participants with missing data for each variable of interest                                                                                                                          | In almost all cases missing data were imputed (see Analysis section), regarding PA and diet there were three / eight children with missing data, this information was included in Table 1 |
|                     |     | (c) <i>Cohort study</i> —Summarise follow-up time (eg, average and total amount)                                                                                                                             | N/A                                                                                                                                                                                       |
| Outcome data        | 15* | <i>Cohort study</i> —Report numbers of outcome events or summary measures over time                                                                                                                          | N/A                                                                                                                                                                                       |
|                     |     | <i>Case-control study</i> —Report numbers in each exposure category, or summary measures of exposure                                                                                                         | N/A                                                                                                                                                                                       |
|                     |     | <i>Cross-sectional study</i> —Report numbers of outcome events or summary measures                                                                                                                           | fulfilled (Table 1)                                                                                                                                                                       |
| Main results        | 16  | (a) Give unadjusted estimates and, if applicable, confounder-adjusted estimates and their precision (eg, 95% confidence interval). Make clear which confounders were adjusted for and why they were included | N/A                                                                                                                                                                                       |
|                     |     | (b) Report category boundaries when continuous variables were categorized                                                                                                                                    | N/A                                                                                                                                                                                       |
|                     |     | (c) If relevant, consider translating estimates of relative risk into absolute risk for a meaningful time period                                                                                             | N/A                                                                                                                                                                                       |
| Other analyses      | 17  | Report other analyses done—eg analyses of subgroups and interactions, and sensitivity analyses                                                                                                               | N/A                                                                                                                                                                                       |
| <b>Discussion</b>   |     |                                                                                                                                                                                                              |                                                                                                                                                                                           |
| Key results         | 18  | Summarise key results with reference to study objectives                                                                                                                                                     | fulfilled                                                                                                                                                                                 |

|                          |    |                                                                                                                                                                            |                                                                                                  |
|--------------------------|----|----------------------------------------------------------------------------------------------------------------------------------------------------------------------------|--------------------------------------------------------------------------------------------------|
| Limitations              | 19 | Discuss limitations of the study, taking into account sources of potential bias or imprecision. Discuss both direction and magnitude of any potential bias                 | fulfilled (page 21/22)                                                                           |
| Interpretation           | 20 | Give a cautious overall interpretation of results considering objectives, limitations, multiplicity of analyses, results from similar studies, and other relevant evidence | fulfilled                                                                                        |
| Generalisability         | 21 | Discuss the generalisability (external validity) of the study results                                                                                                      | fulfilled                                                                                        |
| <b>Other information</b> |    |                                                                                                                                                                            |                                                                                                  |
| Funding                  | 22 | Give the source of funding and the role of the funders for the present study and, if applicable, for the original study on which the present article is based              | According to Plos One's style requirements, the funding should not be included in the manuscript |
